# Supplementary material
Source: MDPI journal article supplement (https://www.mdpi.com/1996-1073/7/2/804)
Supplement: s1 [file s1]

# Supplemental Information

## 1. Detailed Explanation on the Estimation of the Availability Biomass Residues

### 1.1. Oil-Palm Residues

Oil palm residues consist of the following components; empty fruit bunches (generated at the palm oil mills during crude palm oil extraction), fibers and shells (generated at the palm mills), oil palm trunks (generated in the field during replanting), and pruned fronds (generated in the field during replanting). Each residue has current and potential future uses. Thus, the availability estimates were reduced to assure these uses were met (see below). Residue amounts were estimated based 2009 Peninsular Malaysia palm cultivated area of 2.5 million ha.

Private plantations use almost all EFB as a mulching agent [1]. Because 60% of oil-palm plantations are private [2], the available EFB was reduced by 60% to account for this use. Additionally, large palm-oil mills burn EFB to generate electricity (about 85 MW of capacity) for internal use [3], which is estimated to use about 5% of the total EFB. Palm-oil mills are generally accessible by road and the residues are usually piled for storage [4], thus a 100% recoverability rate was assumed. Using these data and assumption, it was estimated that between 1.2 and 1.4 million tonnes (Mt) of EFB are available for co-firing use annually.

Oil-palm fibers and shells are used in large mills to generate steam for the palm-oil extraction process. As such, the available amount was reduced 60% [2] to account for this use. A 100% recoverability rate was assumed as for the EFB [4]. Between 1.3 and 1.6 Mt of fibers, and between 0.79 and 1.1 Mt of shells were calculated to be available for co-firing use, respectively.

Trunks from oil-palm trees are available upon replanting, on average, every 25 years. However, oil-palm trunks have found a new and emerging use in the wood industry for making medium density fiber board, plywood and furniture [5]. About 40% of the trunks are used in the wood industry [6]. A 40% [6] recoverability rate was assumed on the remainder of the palm trunks for co-firing use because these residues need to be removed from the field in rural areas underserved by transportation infrastructure. This results in 1.0 and 1.8 Mt/year of palm trunks being available for co-firing use.

Fronds are left in the field to conserve the soil, act as soil conditioner and prevent erosion [7] Fifty percent of these are assumed 50% available for co-firing. Efforts are also being undertaken to utilize fronds for ruminant feed. A potential new use of fronds is related to feeding ruminants. A Malaysian study found that up to 7 kg/day of fronds can be fed to ruminants [7]. If all of the approximately 1.6 million cows are fed with a mixture of fronds in their daily diet, it would require about 4 Mt/year of fronds. Using the midpoint fronds generation rate (8.2 t/ha) and based on the country's total oil palm planted area of about 4.7 million ha in 2009, it is estimated that 11% of the total fronds could be used as an animal feed. There is no data available to estimate the collection rate of fronds, so the rubber branch recoverability rate of 50% [8] was used as a surrogate for pruned palm fronds. The recoverability rate for fronds from felled trees is assumed to be 40% as before [6]. Between 2.9 and 5.1 Mt of pruned fronds and between 0.23 and 0.23 Mt of fronds from felled trees were estimated to be available for co-firing annually.

### 1.2. Logging Residues

Based on Peninsular Malaysia's production data from 1998 to 2007 [9] and using the double moving average method, logs extracted in 2009 were estimated at approximately 4.4 million m<sup>3</sup>, equivalent to 3.4 Mt (using wood density's midpoint value of 0.78 t/m<sup>3</sup> [10,11]). For every tonne of logs extracted, residues of between 37% [8] and 43% [12] based on the log weight are left behind in the forest. Using these estimates there an estimated 1.3 and 1.5 Mt of logging residues available. Assuming a recovery 65% [13], between 0.82 and 0.95 Mt/year of logging residues are available for co-firing.

There are 577 sawmills and 59 plywood mills operating in 2009 [9,14]. For the sawmills between 13% [12] and 33% [8] of production is residue. The estimated production of sawn timber in 2009 was about 2.2 Mt/year [9] resulting in an estimated annual residue availability of between 0.29 and 0.73 Mt. Yoshida [15] estimated that on average 25% of these residues can be collected for South-East Asian countries. Lim [8] estimated a lower recoverability rate than Yoshida at 13%. Using these recovery estimates as a lower and upper bound results in 0.04 and 0.183 Mt/year of sawmill residues available for co-firing. On average, each mill would have between 66 and 320 t/year of residues.

The estimated 2009 annual plywood production was approximately 0.35 Mt/year [16]. The residues generated were assumed between 40 and 53% [12,15] of production and the recoverability factors were assumed to be the same as for sawmills (13 to 25%) [8,15]. Thus the total recoverable residues from plywood mills were estimated at between 0.018 and 0.046 Mt/year. There are 59 plywood mills and on average, a plywood mill can supply between 305 and 790 t/year of residues for co-firing use.

### 1.3. Rice Residues

In 2009, there were 508,780 ha of rice-fields in Peninsular Malaysia producing 2,126,531 t of grain [17]. Rice residues consist of the rice husk and the straw. There are about between 425,000 and 447,000 t of rice husks, based on estimates that for every tonne of grain, between 0.2 and 0.21 t of husk is produced [18,19]. Rice husks are used to generate process heat for rice drying in Malaysian rice mills [19]. However, there is no data as to how extensive this is practiced. Conservatively, assuming that husks provide all of the drying energy and knowing that rice drying consumes 1,500 MJ of energy/t of rice dried [20], then approximately 230,000 t/year of rice husks are required to process 2.1 Mt of rice annually, based on rice husk's energy content of 14 MJ/kg [20]. Thus, the remaining 195,000 to 217,000 t of rice husks are available for co-firing annually. Rice mills are easily accessible having a developed transportation system and husks are usually piled [21], thus a 100% recoverability rate was assumed.

Rice straw is produced at rates between 0.5 and 1.0 t for every tonne of grain [22]. Therefore, there are about between 1.1 and 2.1 Mt of rice straw left in the field. Currently rice straw is sometimes burned but there are no official numbers. We assume with a market for the straw this practice would cease. However, rice straw is also used as ruminant feed (10%) [22]. At a 65% recoverability rate [13], rice straw, assumed baled and placed on the nearest roadside results in between 0.64 and 1.2 Mt of straw available for co-firing in this study.

#### 1.4. Rubber Residues

Rubber residues consist of tree branches that fall naturally each year and those obtained during replanting. Trunks are used in the furniture market [8]. There are 1,021,540 ha of rubber plantations in 2009 in Peninsular Malaysia [23]. Standing biomass for a rubber tree field is between 6 and 7 t/ha [9], which 5% are naturally fallen branches. The total annual residue availability of about between 0.31 and 0.36 Mt. Lim [8] suggests that the residues are not easily collected or recovered due to labor shortages and access and estimated that only 50% of the branches can be collected economically. Thus the estimated the total recoverable biomass residues is between 0.15 and 0.18 Mt/year.

Using historical rubber cultivation area from 1975 to 2009 [16,23] and based on the economic lifespan of 30 years [24], approximately 1% of the rubber trees or about 10,200 ha are replanted annually. Using the 6 to 7 t/ha of standing biomass in rubber plantations [8], between 0.06 and 0.07 t of rubber trees are harvested annually. Felling of trees leaves residues between 30 and 54% of the original branches per tonne of rubber trees harvested. As such, between 0.02 and 0.04 Mt of branches are available annually due to replanting. At the recoverability rate of 50% [8], the amount of branches are estimated at between 0.01 and 0.02 Mt/year. Total branches (yearly operations above and replanting) is approximately 0.16 and 0.2 Mt/year

#### 1.5. Coconut Residues

Useful coconut residues for energy production consist of the shell, husks, fronds and trunks. The coconut shells, husks and 90% of the fronds are used for domestically production of copra [8]. Based on 2006 data for Peninsular Malaysia [25], about 94,000 ha of planted coconut in Peninsular Malaysia in 2009 [17]. Between 2.3 and 3.9 t/ha of fronds are shed annually [8,26]. With 10% of the fronds available [8] and using the same accessibility rate as for rubber production (50%) [8], between 0.01 and 0.02 Mt of fronds could be used for co-firing. Trunk availability was estimated by using the total standing biomass (39 to 80 t/ha [27,28]), the annual rate at which coconut trees are replanted (1% [16,23]) and accessibility factor of 50% [8] (replanting rate and accessibility factor of rubber plantations are used as surrogates). Thus, we estimated that about 0.02, to 0.03 t of coconut trunks could be recovered for co-firing annually.

#### 1.6. Cocoa Residues

There are only 3,662 ha of cocoa planted in Peninsular Malaysia in 2009 [29]. The cocoa tree is a small tree and obtaining branches during routine pruning is the only economic source of residues [8]. Pruned branches of cocoa trees are estimated to be between 20 and 25 t/ha [8,30]. Using rubber plantation accessibility rate at 50% as surrogate [8], about 0.04 and 0.05 Mt of cocoa branches are available for co-firing use.

#### 1.7. Wood-Based Municipal Solid Waste (MSW)

Data from the Department of National Solid Waste Management were used to estimate the wood-based wastes in landfills in Peninsular Malaysia [31]. There are 98 landfills in operation. The total wastes disposed at landfills are 19,210 t/day or about 7.0 Mt/year [32]. Wood-based MSW in

Malaysia is 24 to 26% of the total waste and includes paper, cardboard, and yard trimmings [32,33]. The average moisture content of Malaysia's MSW is 55% [33]. Seventeen percent of the wood-based MSW is recycled or used as composting materials [32]. Also assuming a 67% recoverability rate [13], between 0.42 and 0.45 Mt/year of wood MSW is available.

## 2. Data for Other Input Parameters Used in the Optimization Model

**Table S1.** Biomass residue types and number of supply locations for each.

| <b>Residue types (<math>T</math>)</b>    | <b>Num. of supply locations (<math>n_i</math>)</b> |
|------------------------------------------|----------------------------------------------------|
| palm oil mill empty fruit bunch residues | 250                                                |
| palm oil mill shell residues             | 250                                                |
| palm oil mill fiber residues             | 250                                                |
| rice mill husk residues                  | 230                                                |
| landfill wood-based MSW residues         | 98                                                 |
| sawmill residues                         | 577                                                |
| plywood mill residues                    | 59                                                 |
| oil palm plantation trunk residues       | 3,325                                              |
| oil palm plantation frond residues       | 3,325                                              |
| rice fields straw residues               | 781                                                |
| logging residues                         | 97                                                 |
| rubber plantation branch residues        | 3,879                                              |
| coconut plantation trunk residues        | 312                                                |
| coconut plantation frond residues        | 312                                                |
| cocoa plantation branch residues         | 17                                                 |

**Table S2.** Additional input data for optimization models.

| Description                                | Unit | Distribution | Min.      | Most likely                                              | Max.      | Notes                                   |
|--------------------------------------------|------|--------------|-----------|----------------------------------------------------------|-----------|-----------------------------------------|
| Energy content of palm EFB                 | GJ/t | Uniform      | 15.5 [34] | -                                                        | 18.8 [35] | -                                       |
| Energy content of palm shell               | GJ/t | Uniform      | 20.1 [35] | -                                                        | 20.7 [34] | -                                       |
| Energy content of palm fiber               | GJ/t | Uniform      | 18.5 [34] | -                                                        | 19.1 [35] | -                                       |
| Energy content of rice husk                | GJ/t | Uniform      | 13.8 [36] | -                                                        | 15.7 [37] | -                                       |
| Energy content of paper and wood-based MSW | GJ/t | Uniform      | 3.4 [38]  | -                                                        | 6.3 [38]  | -                                       |
| Energy content of sawmill residues         | GJ/t | Uniform      | 6.3 [39]  | -                                                        | 18.8 [40] | Used sawdust as surrogate [40].         |
| Energy content of plywood mill residues    | GJ/t | Uniform      | 6.3 [39]  | -                                                        | 18.8 [40] | Used sawdust as surrogate [40].         |
| Energy content of palm trunk               | GJ/t | -            | -         | 17.5 [40]                                                | -         | -                                       |
| Energy content of palm frond               | GJ/t | Uniform      | 7.5 [39]  | -                                                        | 15.7 [3]  | -                                       |
| Energy content of rice straw               | GJ/t | Uniform      | 16.8 [41] | -                                                        | 17.1 [42] | -                                       |
| Energy content of cocoa branches           | GJ/t | Uniform      | 13.9 [39] | -                                                        | 17.9 [43] | Rubber wood as surrogate [43].          |
| Energy content of rubber branches          | GJ/t | Uniform      | 13.9 [39] | -                                                        | 17.9 [43] | Rubber wood as surrogate [43].          |
| Energy content of coconut trunk            | GJ/t | -            | -         | 17.5 [40]                                                | -         | Palm trunk energy content as surrogate. |
| Energy content of coconut frond            | GJ/t | Uniform      | 7.5 [38]  | -                                                        | 15.7 [3]  | Palm frond energy content as surrogate. |
| Energy content of logging residues         | GJ/t | Uniform      | 16.5 [44] | -                                                        | 18.8 [44] | -                                       |
| Coal energy content                        | GJ/t | -            | -         | 31 (Bituminous coal)<br>27 (Sub-bituminous coal)<br>[45] | -         | -                                       |

Table S2. Cont.

| Description                                               | Unit                            | Distribution | Min.         | Most likely | Max.         | Notes                                                                                                                                                                                                                                                                                                                        |
|-----------------------------------------------------------|---------------------------------|--------------|--------------|-------------|--------------|------------------------------------------------------------------------------------------------------------------------------------------------------------------------------------------------------------------------------------------------------------------------------------------------------------------------------|
| Lifecycle GHG emissions rice cultivation                  | t CO <sub>2</sub> -eq/t product | Uniform      | 1.23 [46,47] | -           | 1.83 [46,47] | Blengini and Busto's [46] result showed that between 2.53 and 2.76 kg of CO <sub>2</sub> -eq is emitted per kg rice at mill gate. But he did not give the breakdown of the unit processes. To get only up to the cultivation stage, we subtracted his values from LCA of rice milling emissions from Roy <i>et al.</i> [47]. |
| Lifecycle GHG emissions rice milling                      | t CO <sub>2</sub> -eq/t product | Triangular   | 0.93 [47]    | 1.2 [47]    | 1.3 [47]     | -                                                                                                                                                                                                                                                                                                                            |
| Lifecycle GHG emissions of palm oil                       | t CO <sub>2</sub> -eq/t product | Triangular   | 1.5 [48]     | 2.0 [48]    | 2.5 [48]     | These figures do not include land use change to standardize with estimates of GHG emissions from other biomass/products.                                                                                                                                                                                                     |
| Lifecycle GHG emissions of coconut copra                  | t CO <sub>2</sub> -eq/t product | Uniform      | 0.38 [47]    | -           | 0.43 [47]    | -                                                                                                                                                                                                                                                                                                                            |
| Lifecycle GHG emissions of landfilling                    | t CO <sub>2</sub> -eq/t MSW     | Uniform      | 1.3 [49]     | -           | 1.9 [50]     | Liamsanguan <i>et al.</i> [49] did not include the methane emissions from landfilling. Cherubini <i>et. al.</i> [50] accounted for landfilling methane emissions.                                                                                                                                                            |
| Lifecycle GHG emissions of sawmill/plywood mills products | t CO <sub>2</sub> -eq/t product | Uniform      | 0.34 [51,52] | -           | 0.52 [53]    | -                                                                                                                                                                                                                                                                                                                            |
| Lifecycle emissions of logging                            | t CO <sub>2</sub> -eq/t lumber  | Uniform      | 0.045 [54]   | -           | 0.21 [53]    | -                                                                                                                                                                                                                                                                                                                            |

Table S2. Cont.

| Description                                     | Unit                       | Distribution | Min.         | Most likely | Max.         | Notes                                                                                                                                                                                                                                                                                                                                                                                                                                             |
|-------------------------------------------------|----------------------------|--------------|--------------|-------------|--------------|---------------------------------------------------------------------------------------------------------------------------------------------------------------------------------------------------------------------------------------------------------------------------------------------------------------------------------------------------------------------------------------------------------------------------------------------------|
| Lifecycle GHG emissions of transporting biomass | t CO <sub>2</sub> -eq/t.km | Uniform      | 0.00015 [55] | -           | 0.00045 [55] | Campbell's <i>et al.</i> [55] estimate is for Ultra Low Sulfur Diesel in Australia. We used data from Davis [56] to calculate the energy per t.km, about 2.7 MJ/t.km. We then used NETL's [57] lifecycle GHG emissions factor of diesel fuel (90 g GHG/MJ) to calculate the emissions (about 240 g CO <sub>2</sub> -eq /t.km). The min and max figures have taken into account 14% less energy consumption for the empty trucks return trip [58]. |
| Lifecycle emissions of electricity in Malaysia  | t CO <sub>2</sub> -eq/MWh  | Uniform      | 0.52 [3]     | -           | 0.97 [3]     | Using national electricity generation mix in Malaysia of 2.3% oil, 58% natural gas and 32.4% coal in 2009 [3]. This estimated range of emissions is based on an estimated CO <sub>2</sub> -eq emission factor of 0.75–1.3, 0.52–1.2 and 0.40–0.78 kg/kWh of electricity generated from coal, oil and gas, respectively [59].                                                                                                                      |
| Coal transportation distance                    | km                         | -            | -            | 4,800       | -            | According to a representative from the utility company, all coal is imported from three countries with 10% from South Africa and the remaining 90% from Indonesia and Australia [60]. The distance is the weighted average from these countries (South Africa ~10,500 km; Indonesia ~2,000 km; and Australia ~6,300 km).                                                                                                                          |

## References

1. Menon, N.R.; Rahman, Z.; Bakar, N. Empty fruit bunches evaluation: mulch in plantation vs. fuel for electricity generation. *Oil Palm Ind. Econ. J.* **2003**, *3*, 15–20.
2. Basiron, Y. Palm oil production through sustainable plantations. *Eur. J. Lipid Sci. Technol.* **2007**, *109*, 289–295.
3. Energy Commission Malaysia. *Electricity Supply Industry in Malaysia—Performance and Statistcial Information 2008*; Energy Commission Malaysia: Kuala Lumpur, Malaysia, 2009.
4. MPOC; MPOB. *Fact Sheets: Malaysian Palm Oil*; Malaysian Palm Oil Council and Malaysian Palm Oil Board: Selangor, Malaysia, 2008.
5. Basiron, Y.; Balu, N.; Chandramohan, D. Palm oil: The driving force of world oils and fats economy. *Oil Palm Ind. Econ. J.* **2004**, *4*, 1–10.
6. Wan Asma, I.; Mahanim, S.; Zulkafli, H.; Osman, S.; Mori, Y. Malaysian oil palm biomass. Available online: [http://gec.jp/gec/en/Activities/FY2009/ietc/wab/wab\\_day2-3.pdf](http://gec.jp/gec/en/Activities/FY2009/ietc/wab/wab_day2-3.pdf) (accessed on 3 May 2012).
7. Zahari, M.W.; Hassan, O.A.; Wong, H.; Liang, J. Utilization of oil palm frond-based diets for beef and dairy production in Malaysia. *Asian Aust. J. Anim. Sci.* **2003**, *16*, 625–634.
8. Lim, K.; Zainal, Z.; Quadir, G.; Abdullah, M. Plant based energy potential and biomass utilization in Malaysia. *Int. Energy J.* **2000**, *1*, 77.
9. Forestry Department of Peninsular Malaysia. *Forestry Statistics Peninsular Malaysia 2007*; Forestry Department of Peninsular Malaysia: Kuala Lumpur, Malaysia, 2009.
10. King, D.A.; Davies, S.J.; Tan, S.; Noor, N.S.M. The role of wood density and stem support costs in the growth and mortality of tropical trees. *J. Ecol.* **2006**, *94*, 670–680.
11. Lim, S.; Gan, K., Identification and utilization of lesser-known commercial timbers in Peninsular Malaysia 10: Meraga, Merbau Kera, Merbau Lalat and Minyak Berok. *Timber Technology Bulletin of Malaysia* **2008**, *46*.
12. Hoi, W. K. Current Status of Biomass Utilization in Malaysia. Available on: <http://www.biomass-asia-workshop.jp/biomassws/01workshop/material/Hoi%20Why%20Kong-word.pdf> (accessed on 15 January 2011).
13. Perlack, R.D.; Wright, L.L.; Turhollow, A.F.; Graham, R.L.; Stokes, B.J.; Erbach, D.C. *Biomass as Feedstock for a Bioenergy and Bioproducts Industry: The Technical Feasibility of a Billion-Ton Annual Supply*. Department of Energy, Oak Ridge Lab: Oak Ridge, TN, USA, 2005.
14. Abdul Latip, N. *List of Sawmills and Plywood Mills in Peninsular Malaysia*; Ministry of Natural Resources and Environment: Putrajaya, Malaysia, 2010.
15. Yoshida, T.; Suzuki, H. Current Status of Woody Biomass Utilization in Asean Countries. Available online: [http://www.intechopen.com/download/pdf/pdfs\\_id/11399](http://www.intechopen.com/download/pdf/pdfs_id/11399) (accessed on 15 January 2011).
16. Food and Agriculture Organization. Current Status of Rubber Estates as Forest Plantations. Available online: <http://www.fao.org/DOCREP/005/Y7209E/y7209e07.htm> (accessed 9 January 2012).
17. Ministry of Agriculture and Agro-based Industry Malaysia. *Statsitics on Agro-Food 2009*; Ministry of Agriculture and Agro-based Industry: Putrajaya, Malaysia, 2009.



18. Yoshida, S. *Fundamentals of Rice Crop Science*; International Rice Research Institute: Manila, the Philippines, 1981; pp. 213–230.
19. Hashim, A.B.; Hussin, A.; Siva, K.B., Nutrient content in rice husk ash of some Malaysian rice varieties. *Pertanika J. Trop. Agric. Sci.* **1996**, *19*, 77–80.
20. Ahiduzzaman, M.; Sadrul Islam, A.K. Energy utilization and environmental aspects of rice processing industries in Bangladesh. *Energies* **2009**, *2*, 134–149.
21. Hussin H. *Rice Mill Data*; Ministry of Agriculture and Agro-based Industry: Putrajaya, Malaysia, 2011.
22. Nori, H.; Abdul Halim, R.; Ramlan, M.F. Effects of nitrogen management fertilization practice on the yield and straw nutritional quality of commercial rice varieties. *Malays. J. Math. Sci.* **2008**, *2*, 61–71.
23. Malaysian Rubber Board Natural Rubber Statistics. Available online: <http://www.lgm.gov.my/nrstat/nrstats.pdf> (accessed on 9 January 2012).
24. Nurul Atiqah, M.; Tsan, F.; Razali, A. Growth Performance of Latex Timber Clones. In *Proceedings of the 21st Malaysian Society of Plant Physiology Conference 2010*, Cameron Highlands, Pahang, Malaysia. 13–14 December 2010.
25. Ahmad, F. *Land Use Map of Peninsular Malaysia 2006*; Resource Rehabilitation and Management Division, Department of Agriculture: Putrajaya, Malaysia, 2010.
26. Banzon, J.A. The coconut as a renewable energy source. *The Philipp. J. Coconut Stud.* **1980**, *5*, 31–36.
27. Henson, I.E. An assessment of changes in biomass carbon stocks in tree crops and forests in Malaysia. *J. Trop. For. Sci.* **2005**, *17*, 279–296.
28. Lasco, R.D. Forest carbon budgets in southeast Asia following harvesting and land cover change. *Sci. China Series C Life Sci.-Engl. Ed.* **2002**, *45*, 55–64.
29. Malaysian Cocoa Board Statistics. Cocoa Cultivated Area by Region and Sector. Available online: <http://www.koko.gov.my/lkm/industry/statistic/cocoacultivated.cfm> (accessed on 4 May 2012).
30. Beer, J.; Bonnemann, A.; Chavez, W.; Fassbender, H.; Imbach, A.; Martel, I. Modelling agroforestry systems of cacao (*Theobroma cacao*) with laurel (*Cordia alliodora*) or poró (*Erythrina poeppigiana*) in Costa Rica. *Agrofor. Syst.* **1990**, *12*, 229–249.
31. Yahaya, N. *Statistics of Landfills in Malaysia*; National Solid Waste Management Department: Kuala Lumpur, Malaysia, 2009.
32. Saeed, M.O.; Hassan, M.N.; Mujeebu, M.A., Assessment of municipal solid waste generation and recyclable materials potential in Kuala Lumpur, Malaysia. *Waste Manag.* **2009**, *29*, 2209–2213.
33. Manaf, L.A.; Samah, M.A.A.; Zukki, N.I.M. Municipal solid waste management in Malaysia: Practices and challenges. *Waste Manag* **2009**, *29*, 2902–2906.
34. Yusoff, S. Renewable energy from palm oil—Innovation on effective utilization of waste. *J. Clean. Prod.* **2006**, *14*, 87–93.
35. Chow, M.C.; Wahid, M.B.; Chan, K.W. Availability and potential of biomass resources from the Malaysian palm oil industry for generating renewable energy. *Oil Palm Bull.* **2008**, *56*, 23–28.
36. Chungsangunsit, T.; Gheewala, S.H.; Patumsawad, S. Emission assessment of rice husk combustion for power production. *World Acad. Sci. Eng. Technol.* **2009**, *53*, 1070–1075.

37. Janvijitsakul, K.; Kuprianov, V.I. Major gaseous and PAH emissions from a fluidized-bed combustor firing rice husk with high combustion efficiency. *Fuel Process. Technol.* **2008**, *89*, 777–787.
38. Bhattacharya, S.; Abdul Salam, P.; Runqing, H.; Somashekar, H.; Racelis, D.; Rathnasiri, P.; Yingyuad, R. An assessment of the potential for non-plantation biomass resources in selected Asian countries for 2010. *Biomass Bioenergy* **2005**, *29*, 153–166.
39. Laohalidanond, K.; Heil, J.; Wirtgen, C. The production of synthetic diesel from biomass. *KMITL Sci. Tech. J.* **2006**, *6*, 35–45.
40. Cao, Y.; Wang, Y.; Riley, J.T.; Pan, W.P. A novel biomass air gasification process for producing tar-free higher heating value fuel gas. *Fuel Process. Technol.* **2006**, *87*, 343–353.
41. Raveendran, K.; Ganesh, A.; Khilar, K.C. Influence of mineral matter on biomass pyrolysis characteristics. *Fuel* **1995**, *74*, 1812–1822.
42. Shie, J.-L.; Chang, C.-Y.; Chen, C.-S.; Shaw, D.-G.; Chen, Y.-H.; Kuan, W.-H.; M, H.-K. Energy life cycle assessment of rice straw bio-energy derived from potential gasification technologies. *Bioresour. Technol.* **2011**, *102*, 6735–6741.
43. Krukanont, P.; Prasertsan, S., Geographical distribution of biomass and potential sites of rubber wood fired power plants in Southern Thailand. *Biomass Bioenergy* **2004**, *26*, 47–59.
44. Miskam, M.A.; Alauddin, Z.; Mustafa, K.F. *Performance Characteristic of a Cyclone Gasifier For Power Generation*; Universiti Sains Malaysia: Penang, Malaysia, 2007.
45. Australian Institute of Energy. Fact sheet 3: Coal. Available online: [http://aie.org.au/Content/NavigationMenu/Resources/SchoolProjects/FS3\\_COAL.pdf](http://aie.org.au/Content/NavigationMenu/Resources/SchoolProjects/FS3_COAL.pdf) (accessed on 14 August 2011).
46. Blengini, G. A.; Busto, M. The life cycle of rice: LCA of alternative agri-food chain management systems in Vercelli (Italy). *J. Environ. Manag.* **2009**, *90*, 1512–1522.
47. Roy, P.; Shimizu, N.; Okadome, H.; Shiina, T.; Kimura, T. Life cycle of rice: Challenges and choices for Bangladesh. *J. Food Eng.* **2007**, *79*, 1250–1255.
48. Hassan, M.N.A.; Jaramillo, P.; Griffin, W.M. Life cycle GHG emissions from Malaysian oil palm bioenergy development: The impact on transportation sector's energy security. *Energy Policy* **2011**, *39*, 2615–2625.
49. Liamsanguan, C.; Gheewala, S.H. LCA: A decision support tool for environmental assessment of MSW management systems. *J. Environ. Manag.* **2008**, *87*, 132–138.
50. Cherubini, F.; Bargigli, S.; Ulgiati, S. Life cycle assessment (LCA) of waste management strategies: Landfilling, sorting plant and incineration. *Energy* **2009**, *34*, 2116–2123.
51. Berg, S.; Lindholm, E. L. Energy use and environmental impacts of forest operations in Sweden. *J. Clean. Prod.* **2005**, *13*, 33–42.
52. Milota, M.R.; West, C.D.; Hartley, I.D. Gate-to-gate life-cycle inventory of softwood lumber production. *Wood Fiber Sci.* **2005**, *37*, 47–57.
53. Puettmann, M.E.; Bergman, R.; Hubbard, S.; Johnson, L.; Lippke, B.; Oneil, E.; Wagner, F.G. Cradle-to-gate life-cycle inventory of US wood products production: CORRIM Phase I and Phase II products. *Wood Fiber Sci.* **2010**, *42*, 15–28.
54. McCallum, D. Carbon Footprint: Nelson Forest Ltd. Available online: [http://www.nzwood.co.nz/images/uploads/file/Nelson%20Forests%20LCA%20Study/Report\\_NFL\\_CarbonFootprint\\_V61.pdf](http://www.nzwood.co.nz/images/uploads/file/Nelson%20Forests%20LCA%20Study/Report_NFL_CarbonFootprint_V61.pdf) (accessed on 22 June 2011).

55. Campbell, P.K.; Beer, T.; Batten, D.; CSIRO, *Greenhouse Gas Sequestration by Algae: Energy and Greenhouse Gas Life Cycle Studies*; CSIRO Energy Transformed Flagship: Melbourne, Australia, 2009.
56. Davis, S.C.; Diegel, S.W.; Boundy, R.G. *Transportation Energy Data Book*, 28th ed.; Oak Ridge National Laboratory: Oak Ridge, TN, USA, 2009.
57. National Energy Technology Laboratory. Development of Baseline Data and Analysis of Life Cycle Greenhouse Gas Emissions of Petroleum-Based Fuels; Department of Energy: Washington, DC, USA, 2008; p. 310.
58. Stodolsky, F.; Gaines, L.; Vyas, A. *Analysis of Technology Options to Reduce the Fuel Consumption of Idling Trucks*; ANL/ESD-43; Argonne National Lab: IL, USA, 2000.
59. Weisser, D. A guide to life-cycle greenhouse gas (GHG) emissions from electric supply technologies. *Energy* **2007**, *32*, 1543–1559.
60. Abd. Jamil A.R. *Research on Biomass to Electricity: Tenaga Nasional Berhad's Experience on Coal Ash*; Ministry of Natural Resources and Environment: Kuala Lumpur, Malaysia, 2011.

© 2014 by the authors; licensee MDPI, Basel, Switzerland. This article is an open access article distributed under the terms and conditions of the Creative Commons Attribution license (<http://creativecommons.org/licenses/by/3.0/>).
